# Supplementary material for: Conceptualising, operationalising and measuring trust in participatory health research networks: a scoping review protocol
Source: PubMed Central journal article supplement — BMJ Open. 2020 Oct 29;10(10):e038840. doi: 10.1136/bmjopen-2020-038840 (PMC7597520; doi:10.1136/bmjopen-2020-038840), 2020-10-29
Supplement: bmjopen-2020-038840supp001.pdf [file bmjopen-2020-038840supp001.pdf]

## Appendix A

### Search strategy in CINAHL

#### Search History/Alerts

[Print Search History](#) [Retrieve Searches](#) [Retrieve Alerts](#) [Save Searches / Alerts](#)

| <input type="checkbox"/> Select / deselect all <input type="button" value="Search with AND"/> <input type="button" value="Search with OR"/> <input type="button" value="Delete Searches"/> <input type="button" value="Refresh Search Results"/> |                                                                                                                                                                                                                                                                                                    |                                                                                      |                                                                                             |
|--------------------------------------------------------------------------------------------------------------------------------------------------------------------------------------------------------------------------------------------------|----------------------------------------------------------------------------------------------------------------------------------------------------------------------------------------------------------------------------------------------------------------------------------------------------|--------------------------------------------------------------------------------------|---------------------------------------------------------------------------------------------|
| Search ID#                                                                                                                                                                                                                                       | Search Terms                                                                                                                                                                                                                                                                                       | Search Options                                                                       | Actions                                                                                     |
| <input type="checkbox"/> S6                                                                                                                                                                                                                      | (((MM "Social Networks") OR TI ( social networks OR social network ) OR AB ( social networks OR social network )) AND (S2 AND S4)) AND (S1 AND S2 AND S4)                                                                                                                                          | <b>Expanders</b> - Apply equivalent subjects<br><b>Search modes</b> - Boolean/Phrase | <a href="#">View Results</a> (6)   <a href="#">View Details</a>   <a href="#">Edit</a>      |
| <input type="checkbox"/> S5                                                                                                                                                                                                                      | (((MM "Social Networks") OR TI ( social networks OR social network ) OR AB ( social networks OR social network )) AND (S2 AND S4))                                                                                                                                                                 | <b>Expanders</b> - Apply equivalent subjects<br><b>Search modes</b> - Boolean/Phrase | <a href="#">View Results</a> (391)   <a href="#">View Details</a>   <a href="#">Edit</a>    |
| <input type="checkbox"/> S4                                                                                                                                                                                                                      | (MM "Social Networks") OR TI ( social networks OR social network ) OR AB ( social networks OR social network )                                                                                                                                                                                     | <b>Expanders</b> - Apply equivalent subjects<br><b>Search modes</b> - Boolean/Phrase | <a href="#">View Results</a> (13,927)   <a href="#">View Details</a>   <a href="#">Edit</a> |
| <input type="checkbox"/> S3                                                                                                                                                                                                                      | S1 AND S2                                                                                                                                                                                                                                                                                          | <b>Expanders</b> - Apply equivalent subjects<br><b>Search modes</b> - Boolean/Phrase | <a href="#">View Results</a> (379)   <a href="#">View Details</a>   <a href="#">Edit</a>    |
| <input type="checkbox"/> S2                                                                                                                                                                                                                      | MM "Trust" OR TI ( trust or trusting or trustworthiness or trustworthy ) OR AB ( trust or trusting or trustworthiness or trustworthy )                                                                                                                                                             | <b>Expanders</b> - Apply equivalent subjects<br><b>Search modes</b> - Boolean/Phrase | <a href="#">View Results</a> (34,194)   <a href="#">View Details</a>   <a href="#">Edit</a> |
| <input type="checkbox"/> S1                                                                                                                                                                                                                      | MM "Action Research" OR TI ( action research OR community-based participatory research OR public and patient involvement OR participatory health research ) OR AB ( action research OR community-based participatory research OR public and patient involvement OR participatory health research ) | <b>Expanders</b> - Apply equivalent subjects<br><b>Search modes</b> - Boolean/Phrase | <a href="#">View Results</a> (8,960)   <a href="#">View Details</a>   <a href="#">Edit</a>  |
