# Supplementary material for: Conceptualising, operationalising and measuring trust in participatory health research networks: a scoping review protocol
Source: PubMed Central journal article supplement — BMJ Open. 2020 Oct 29;10(10):e038840. doi: 10.1136/bmjopen-2020-038840 (PMC7597520; doi:10.1136/bmjopen-2020-038840), 2020-10-29
Supplement: bmjopen-2020-038840supp002.pdf [file bmjopen-2020-038840supp002.pdf]

## Appendix B

## Prisma Flow Diagram 2009

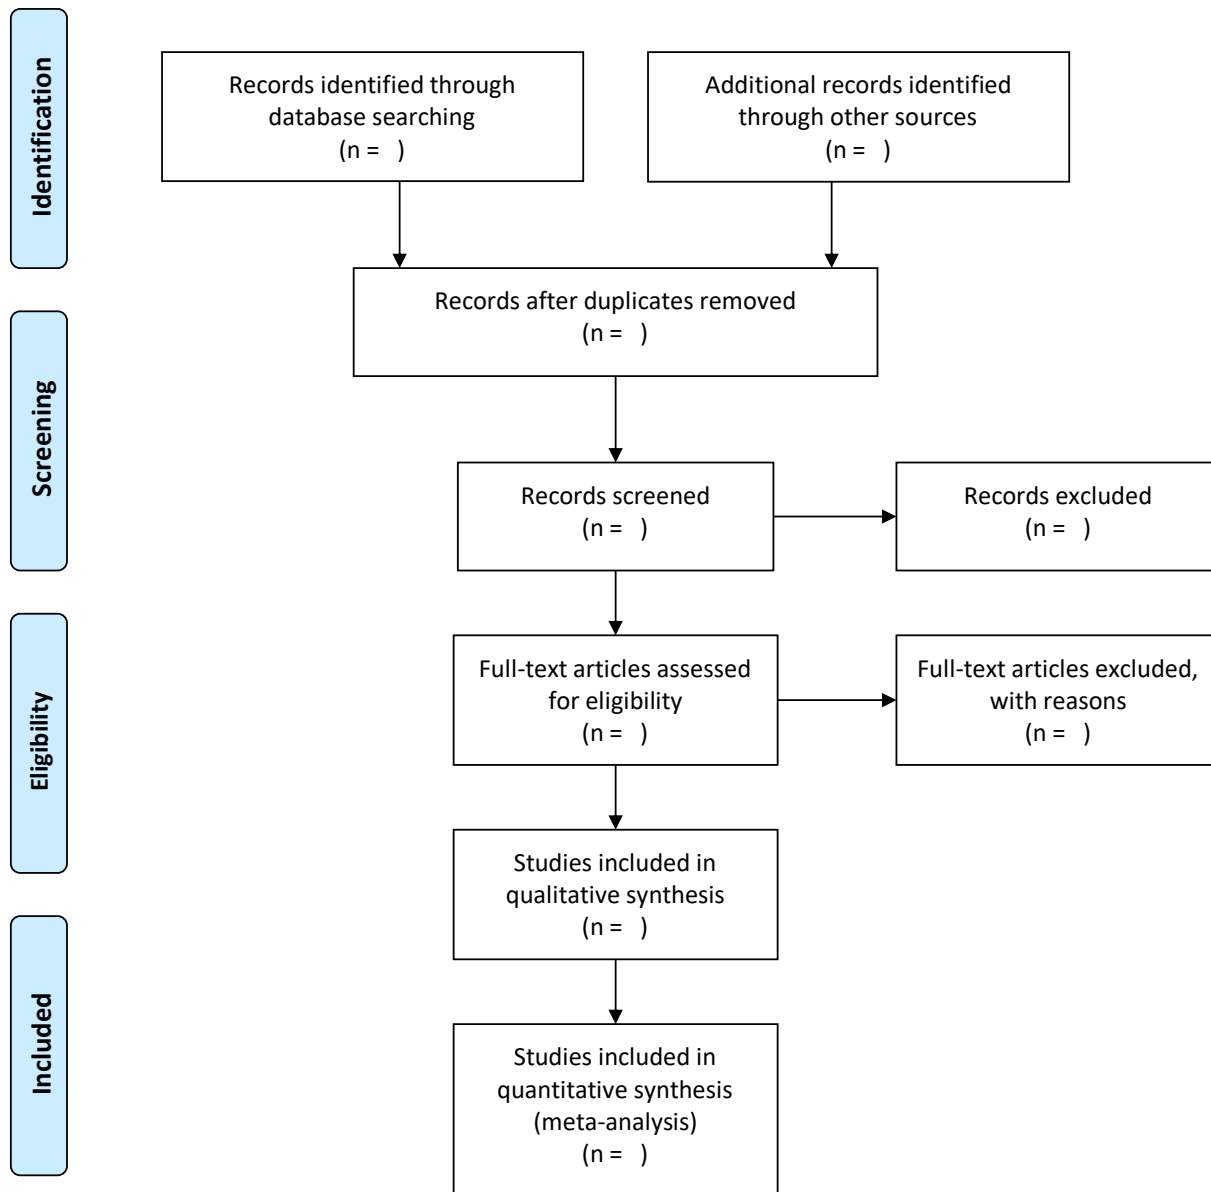

From: Moher D, Liberati A, Tetzlaff J, Altman DG, The PRISMA Group (2009). Preferred Reporting Items for Systematic Reviews and Meta-Analyses: The PRISMA Statement. PLoS Med 6(7): e1000097. doi:10.1371/journal.pmed1000097

For more information, visit [www.prisma-statement.org](http://www.prisma-statement.org).
